# Supplementary material for: Icaritin promotes apoptosis and inhibits proliferation by down-regulating AFP gene expression in hepatocellular carcinoma
Source: PubMed Central journal article supplement (PMC7992931; doi:10.1186/s12885-021-08043-9), 2021-03-25

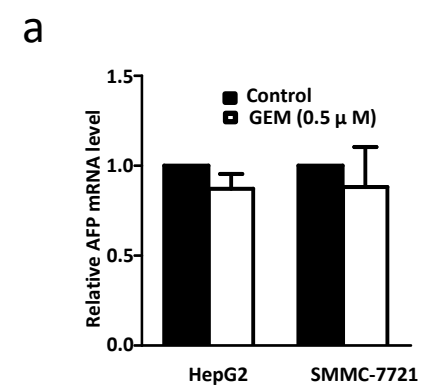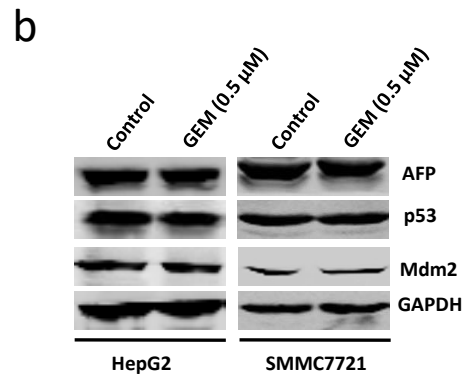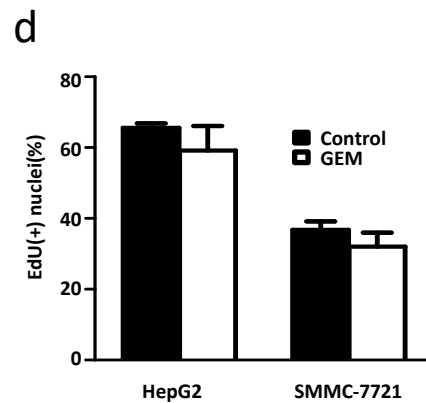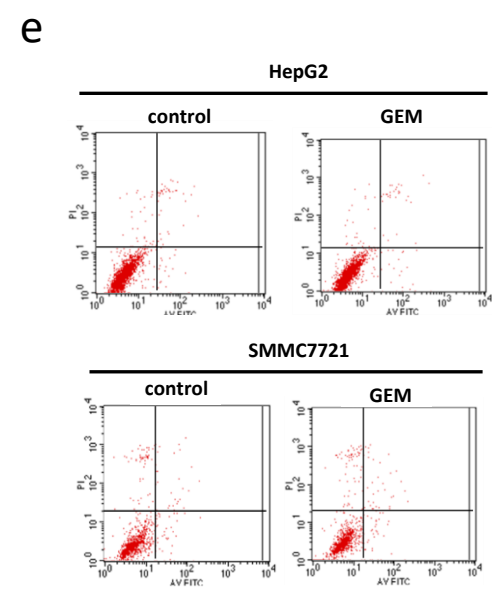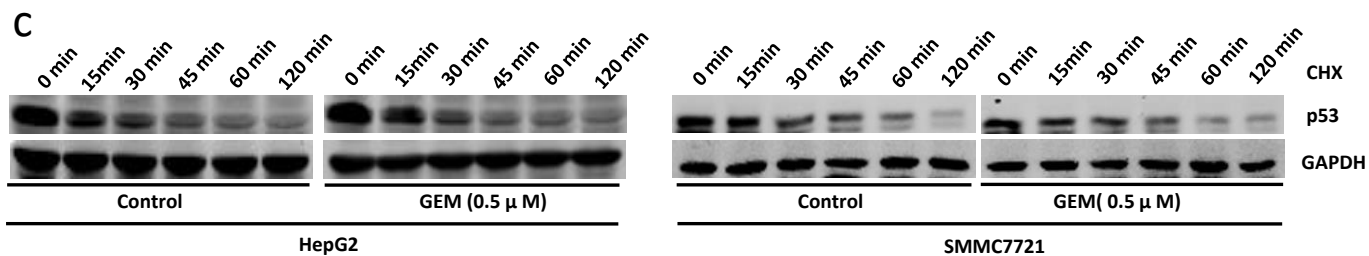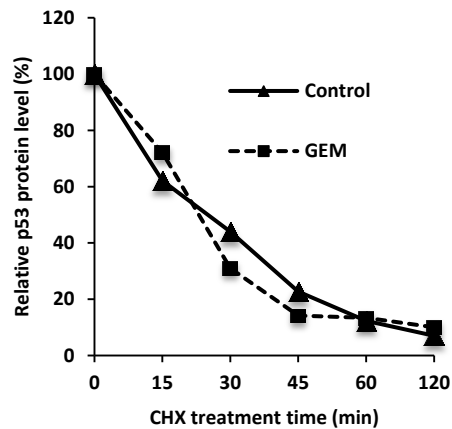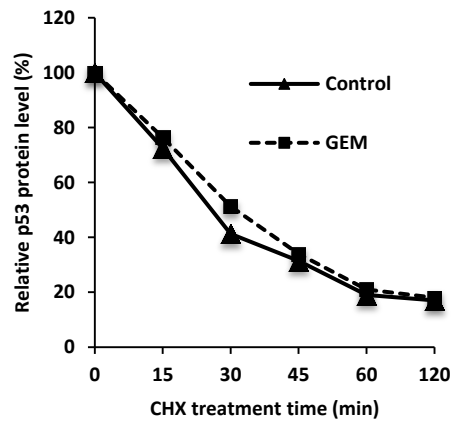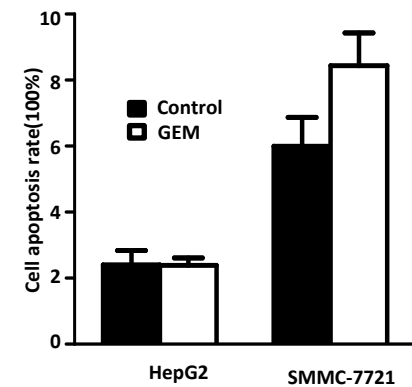

Supplement: 12885_2021_8043_MOESM1_ESM.pdf [file 12885_2021_8043_MOESM1_ESM.pdf]
